# Supplementary material for: Photocatalytic degradation of microcystin-LR with a nanostructured photocatalyst based on upconversion nanoparticles@TiO2 composite under simulated solar lights
Source: PubMed Central journal article supplement (PMC5663843; doi:10.1038/s41598-017-14746-6), 2017-10-31
Supplement: 41598_2017_14746_MOESM1_ESM.pdf [file 41598_2017_14746_MOESM1_ESM.pdf]

# Photocatalytic degradation of microcystin-LR with a nanostructured photocatalyst based on upconversion nanoparticles-TiO<sub>2</sub> composite under simulated solar lights

Shijia Wu<sup>1,2\*</sup>, Jiajia Lv<sup>2</sup>, Fang Wang<sup>2</sup>, Nuo Duan<sup>1,2</sup>, Qian Li<sup>2</sup>, Zhouping Wang<sup>1,2\*</sup>

<sup>1</sup> State Key Laboratory of Food Science and Technology, Jiangnan University,

Wuxi 214122, China

<sup>2</sup> School of Food Science and Technology, Jiangnan University, Wuxi 214122, China

\* Corresponding author. Tel/Fax: +86 510 8591 7023. E-mail: [wusj1986@163.com](mailto:wusj1986@163.com); [wangzp@jiangnan.edu.cn](mailto:wangzp@jiangnan.edu.cn).

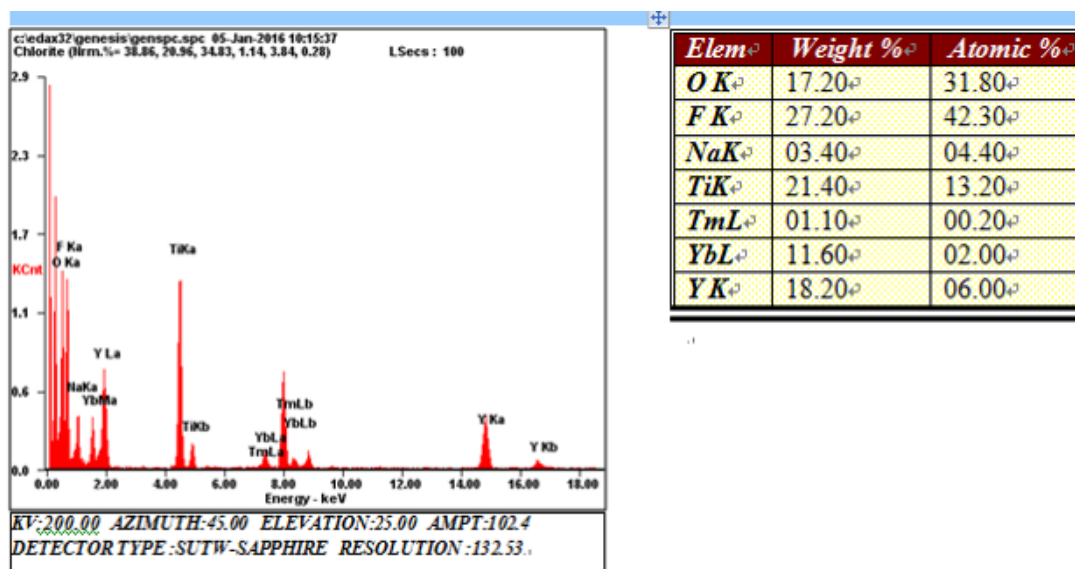

Figure S1. Composition analysis by EDS of NaYF<sub>4</sub>:Yb, Tm@TiO<sub>2</sub>.

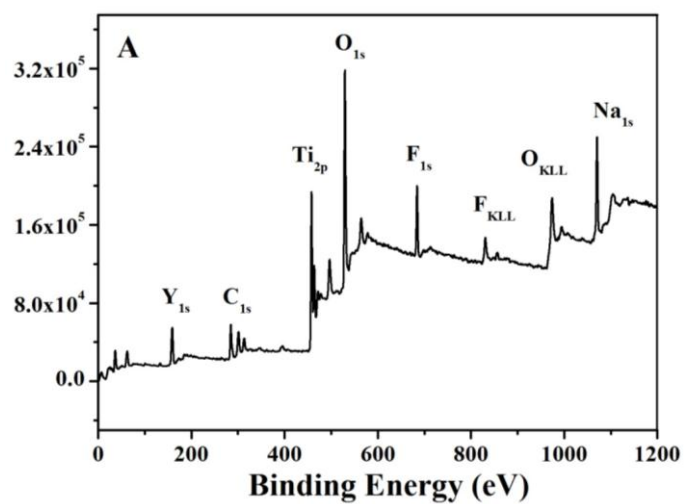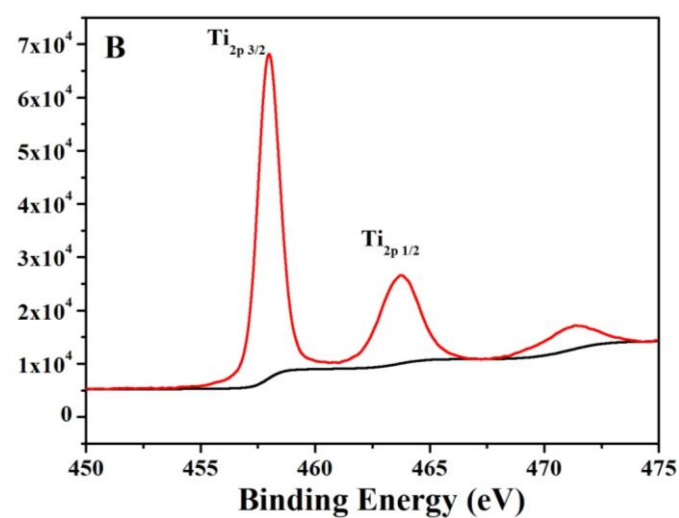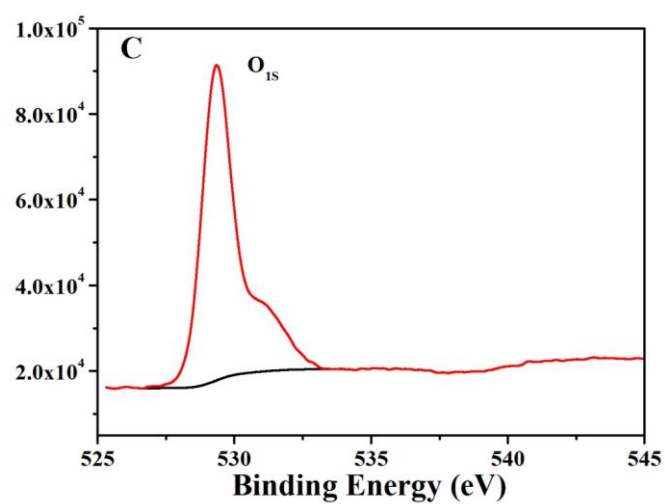

**Figure S2.** XPS spectra of NaYF<sub>4</sub>:Yb, Tm@TiO<sub>2</sub> (A), element Ti (B) and element O (C).

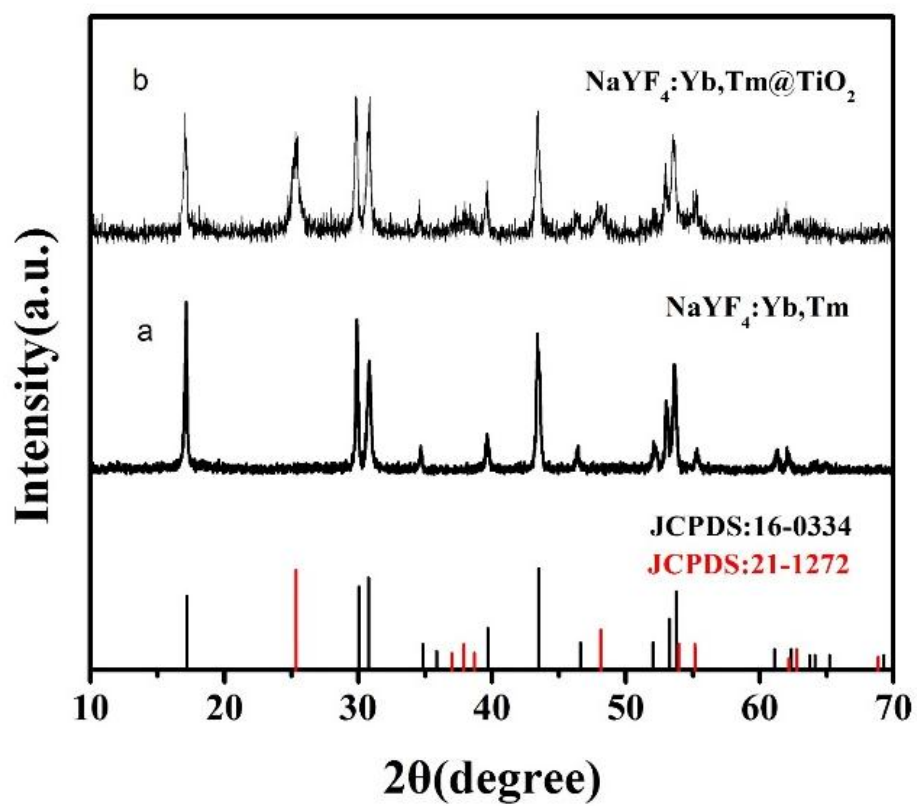

**Figure S3.** XRD patterns of  $\text{NaYF}_4:\text{Yb, Tm}$  (a) and  $\text{NaYF}_4:\text{Yb, Tm}@TiO_2$  nanoparticles (b).

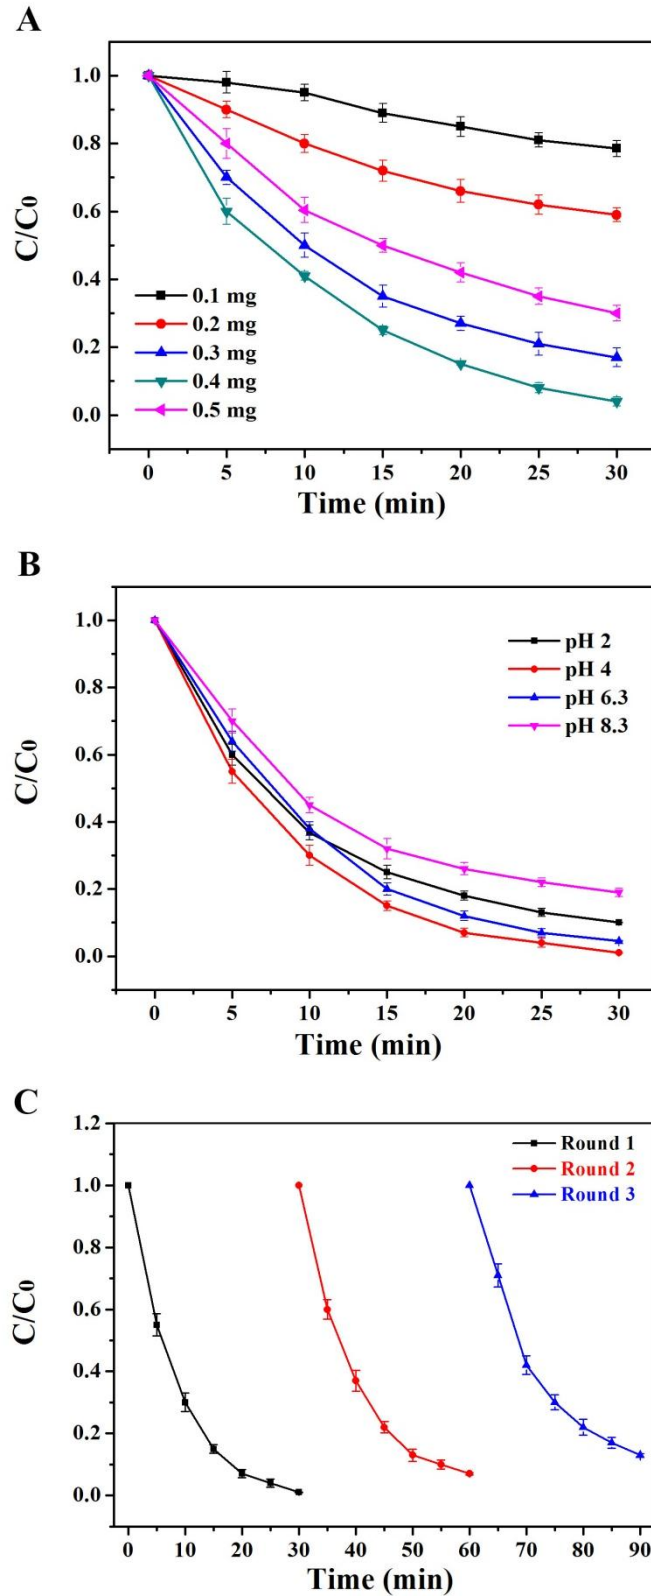

**Figure S4.** Photocatalytic degradation of MC-LR in the presence of different initial concentration of NaYF<sub>4</sub>:Yb, Tm@TiO<sub>2</sub> under full spectrum (A), Photocatalytic degradation of MC-LR at different pH under full spectrum (B), Recyclability of the NaYF<sub>4</sub>:Yb, Tm@TiO<sub>2</sub> nanoparticles for the degradation of MC-LR via centrifugation (C).

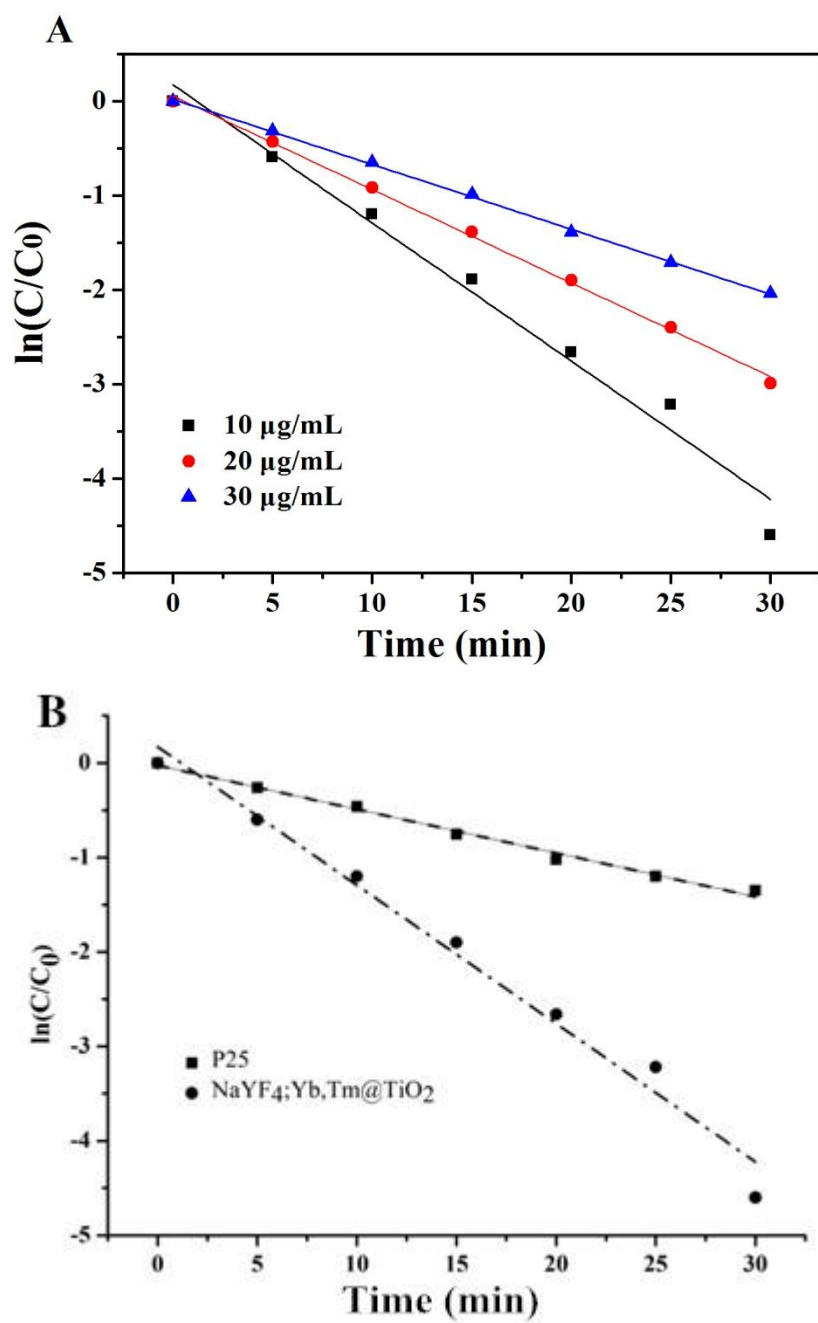

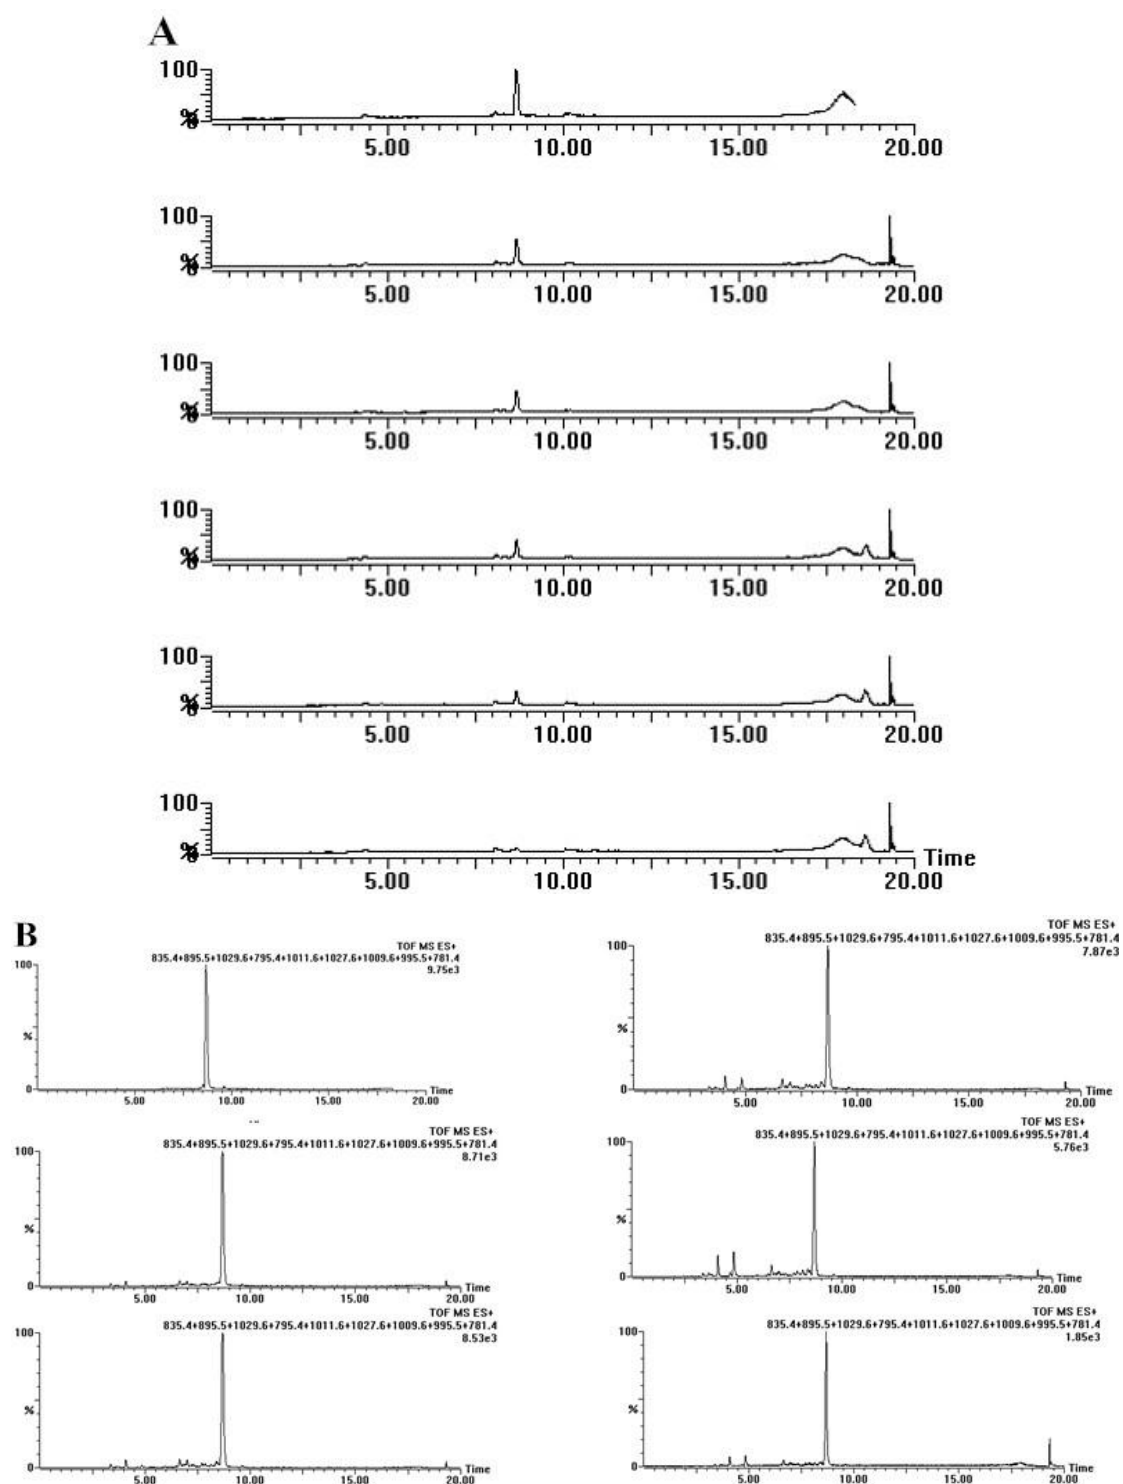

**Figure S6.** The total ion chromatogram (TIC) (A) and the selective ion flow diagram (B) of the MC-LR and intermediates vs. time.

**Table S1.** Kinetic parameters of photocatalytic degradation of MC-LR at varying concentrations

| $C_0(\mu\text{g/mL})$ | Pseudo-first-order kinetics   | $k(\text{min}^{-1})$ | $R^2$ |
|-----------------------|-------------------------------|----------------------|-------|
| 10                    | $\ln(C_0/C)=-0.147 t + 0.172$ | 0.147                | 0.980 |
| 20                    | $\ln(C_0/C)=-0.099 t + 0.060$ | 0.099                | 0.997 |
| 30                    | $\ln(C_0/C)=-0.069 t + 0.019$ | 0.069                | 0.999 |

**Table S2.** Kinetic parameters of degradation of MC-LR with different photocatalysts

| Photocatalysis                             | Pseudo-first-order kinetics   | $k(\text{min}^{-1})$ | $R^2$ |
|--------------------------------------------|-------------------------------|----------------------|-------|
| NaYF <sub>4</sub> :Yb, Tm@TiO <sub>2</sub> | $\ln(C_0/C)=-0.147 t + 0.172$ | 0.147                | 0.980 |
| P25                                        | $\ln(C_0/C)=-0.046 t - 0.025$ | 0.046                | 0.991 |

**Table S3.** Intermediates detected from the degradation of MC-LR by NaYF<sub>4</sub>:Yb, Tm@TiO<sub>2</sub>

| No | Peak (m/z) | Reserve Time (min) |
|----|------------|--------------------|
| 1  | 995.5      | 8.676              |
| 2  | 781.4      | 3.643              |
| 3  | 795.4      | 3.375              |
| 4  | 835.4      | 4.083              |
| 5  | 1009.6     | 9.609              |
| 6  | 1011.6     | 6.509              |
| 7  | 1027.6     | 8.814              |
| 8  | 1029.6     | 6.647              |

**Table S4.** The comparison of degradation efficiency of the current methods for MC-LR

| Methods and reagents                                          | Reagent dosage (mg/mL)                                                                                       | Spectra                                 | Initial MC-LR ( $\mu\text{g/mL}$ ) | Degradation rate | Reaction time (min) | Reference                                  |
|---------------------------------------------------------------|--------------------------------------------------------------------------------------------------------------|-----------------------------------------|------------------------------------|------------------|---------------------|--------------------------------------------|
| O <sub>3</sub>                                                | 1.5                                                                                                          | ---                                     | 50                                 | 70%              | 1                   | Heng-Feng Miao, et al. <sup>[1]</sup>      |
| H <sub>2</sub> O <sub>2</sub>                                 | 4.0                                                                                                          | UV-B (312 nm)                           | 0.1                                | ~100%            | 120                 | Moon, Bo-Ram, et al. <sup>[2]</sup>        |
| Fenton reagent (Fe(II)/H <sub>2</sub> O <sub>2</sub> )        | 5 $\times$ 10 <sup>-3</sup> Fe(II) and<br>5 $\times$ 10 <sup>-3</sup> H <sub>2</sub> O <sub>2</sub>          | ---                                     | 0.2                                | 76.77%           | 30                  | Park, Jeong-Ann, et al. <sup>[3]</sup>     |
| O <sub>3</sub> / H <sub>2</sub> O <sub>2</sub>                | 0.1 $\times$ 10 <sup>-3</sup> O <sub>3</sub> and 0.1 $\times$ 10 <sup>-4</sup> H <sub>2</sub> O <sub>2</sub> | ---                                     | 1                                  | 95%              | 1.3                 | Al Momani, Fares, et al. <sup>[4]</sup>    |
| Mn/Ti-doped carbon xerogel                                    | 1 wt% Ti and 0.5 wt% Mn                                                                                      | UV                                      | 10                                 | 88.6%            | 6                   | Xin, Qing, et al. <sup>[5]</sup>           |
| 3D interconnected mesoporous TiO <sub>2</sub>                 | 0.3                                                                                                          | UV-C ( $\lambda = 254$ nm)              | 10                                 | 100%             | 17.5                | Dong, Weiyang, et al. <sup>[6]</sup>       |
| TiO <sub>2</sub> nano-film                                    | 38 $\times$ 51 $\times$ 1.5 mm                                                                               | UV-A ( $\lambda_{\text{max}} = 365$ nm) | 0.02                               | 95%              | 120                 | Feng, Xiaogang, et al. <sup>[7]</sup>      |
| TiO <sub>2</sub> -graphene@Fe <sub>3</sub> O <sub>4</sub>     | 0.5                                                                                                          | UV-A ( $\lambda_{\text{max}} = 365$ nm) | 0.5                                | ~100%            | 30                  | Liang, Yulu, et al. <sup>[8]</sup>         |
| TiO <sub>2</sub> coated glass microspheres                    | 58.8                                                                                                         | UV-vis (330-450nm)                      | 10                                 | ~100%            | 8                   | Pestana, Carlos J., et al. <sup>[9]</sup>  |
| TiO <sub>2</sub> (Degussa P-25)                               | 1.0                                                                                                          | UV- vis (330-450nm)                     | 1000                               | 100%             | 45                  | Liu, Iain, et al. <sup>[10]</sup>          |
| NF-TiO <sub>2</sub>                                           | 0.5                                                                                                          | UV-vis                                  | 0.5                                | ~100%            | 30                  | Pelaez, Miguel, et al. <sup>[11]</sup>     |
| As-synthesized Ag <sub>3</sub> PO <sub>4</sub> photocatalyst  | 26.67                                                                                                        | visible light                           | 9.06                               | 99.98%           | 300                 | Sui, Xin, et al. <sup>[12]</sup>           |
| C, N and S doped mesoporous anatase-brookite TiO <sub>2</sub> | 0.5                                                                                                          | visible light                           | 0.5                                | ~100%            | 300                 | El-Sheikh, Said M., et al. <sup>[13]</sup> |
| Graphene oxide-TiO <sub>2</sub> composite                     | 0.2                                                                                                          | solar light                             | 10                                 | 97%              | 60                  | Fotiou, Theodora, et al. <sup>[14]</sup>   |
| Nitrogen doped TiO <sub>2</sub>                               | 0.2                                                                                                          | solar light                             | 10                                 | 100%             | 240                 | Triantis, T. M., et al. <sup>[15]</sup>    |
| UCNP@TiO <sub>2</sub>                                         | 0.4                                                                                                          | solar light                             | 10                                 | 100%             | 30                  | This study                                 |



### **HPLC conditions**

Separation was achieved on an BEH C18 analytical column (150 mm×2.1 mm, 1.7 μm) and under the column temperature of 45 °C. The mobile phase A is acetonitrile, and methanol is for mobile phase B. The gradient program was 0-15 min from 10% A to 70% A, 15-18 min from 100% A to 70% A, and 18-18.1 min from 100% A to 10% flowing at 0.8 mL/min. The UV detector was set at 238 nm.

### **Mass spectrometer conditions**

Quadrupole time-of-flight mass spectrometer was used for detection with an electro-spray ionization (ESI) source in the positive mode. Ion source temperature is 100 °C, capillary voltage 3.5 V, vaporizer temperature 400 °C. The mass range acquired was from 100 to 2000 m/z.

### **Comparison of the current degradation methods**

The MC-LR degradation rates in other articles compared with our work were listed in the Table S4. Different types of methods and several nanocomposites based on TiO<sub>2</sub> were included. Some chemical reagents were used to degrade MC-LR, mainly including H<sub>2</sub>O<sub>2</sub>, O<sub>3</sub>. High dose of H<sub>2</sub>O<sub>2</sub> or O<sub>3</sub> was needed in order to high efficiency. In some reports, synergy of two or three chemical reagents maybe could improve the efficiency. However, chemical reagents cannot oxidize all MC-LR in water owing to its poor solubility. In addition, such chemically intensive technology may form harmful even carcinogenic disinfection by-product. High costs associated with chemical processes generally make them unaffordable in practical treatments. Photocatalytic oxidation technology has attracted increasing attention because of its low energy consumption, simple operation and nontoxicity. In particular, TiO<sub>2</sub>-based photocatalysis is one of the most common technologies. Due to the wide band gap of TiO<sub>2</sub>, conventional methods of photocatalytic degradation were still restricted by UV or visible radiation. To achieve high degradation efficiency, these processes required longer reaction time and more dosage of photocatalysts. Some advanced methods

were used to degrade MC-LR by solar light, because TiO<sub>2</sub> doped with graphene oxide or nitrogen extended the light adsorption. In this study, UCNP@TiO<sub>2</sub> photocatalysts were used to absorb the NIR energy of solar lights as driving source for photocatalysis besides the UV light. Compared with the previous methods, this study exhibits a higher degradation rate, time saving, less dosage usage and environmentally sustainable.

## References

- [1] Miao, H. F., Qin, F., Tao, G. J., Tao, W. Y. & Ruan, W.Q. Detoxification and degradation of microcystin-LR and -RR by ozonation. *Chemosphere*. **79**, 355–361 (2010).
- [2] Moon, B. R., Kim, T. K., Kim, M. K., Choi, J. & Zoh, K. D. Degradation mechanisms of Microcystin-LR during UV-B photolysis and UV/H<sub>2</sub>O<sub>2</sub> processes: Byproducts and pathways. *Chemosphere*. **185**, 1039-1047 (2017).
- [3] Park, J. A., Yang, B., Park, C., Choi, J. W., van Genuchten, C. M. & Lee, S. H. Oxidation of microcystin-LR by the Fenton process: Kinetics, degradation intermediates, water quality and toxicity assessment. *Chem Eng J*. **309**, 339-348 (2017).
- [4] Al Momani, F., Smith, D. W. & El-Din, M. G. Degradation of cyanobacteria toxin by advanced oxidation processes. *J Hazard Mater*. **150**, 238-249 (2008).
- [5] Xin, Q., Zhang, Y., Li, Z. J., Lei, L. C. & Yang, B. Mn/Ti-doped carbon xerogel for efficient catalysis of microcystin-LR degradation in the water surface discharge plasma reactor. *Environ Sci Pollut R*. **22**, 17202-17208 (2015).
- [6] Dong, W. Y., Yao, Y. W., Li, L., Sun, Y. J., Hua, W. M., Zhuang, G. S., Zhao, D. Y., Yan, S. W. & Song, W. H. Three-Dimensional Interconnected Mesoporous Anatase TiO<sub>2</sub> Exhibiting Unique Photocatalytic Performances. *Appl Catal B: Environ*. **217**, 293-302 (2017).
- [7] Fieng, X. G., Rong, F., Fu, D. G., Yuan, C. W. & Hu, Y. Photocatalytic degradation of trace-level of Microcystin-LR by nano-film of titanium dioxide. *Chinese Sci Bull*. **51**, 1191-1198 (2006).
- [8] Liang, Y. L., He, X. W., Chen, L. X. & Zhang, Y. K. Preparation and characterization of TiO<sub>2</sub>-Graphene@ Fe<sub>3</sub>O<sub>4</sub> magnetic composite and its application in the removal of trace amounts of microcystin-LR. *RSC Adv*. **4**, 56883-56891 (2014).

- [9] Pestana, C. J., Edwards, C., Prabhu, R., Robertson, P. K. J. & Lawton, L. A. Photocatalytic degradation of eleven microcystin variants and nodularin by TiO<sub>2</sub> coated glass microspheres. *J Hazard Mater.* **300**, 347-353 (2015).
- [10] Liu, I., Lawton, L. A., Cornish, B. & Robertson, P. K. J. Mechanistic and toxicity studies of the photocatalytic oxidation of microcystin-LR. *J Photoch Photobio A.* **148**, 349-354 (2002).
- [11] Pelaez, M., Falaras, P., Likodimos, V., O'Shea, K., de la Cruz, A. A., Dunlop, P. S. M., Byrne, J. A. & Dionysiou, D. D. Use of selected scavengers for the determination of NF-TiO<sub>2</sub> reactive oxygen species during the degradation of microcystin-LR under visible light irradiation. *J Mol Catal A-Chem.* **425**, 183-189 (2016).
- [12] Sui, X., Wang, X. R., Huang, H. H., Peng, H. H., Peng, G. T., Wang, S. B. & Fan, Z. Q. A novel photocatalytic material for removing microcystin-LR under visible light irradiation: degradation characteristics and mechanisms. *PloS one.* **9**, e95798 (2014).
- [13] El-Sheikh, S. M., Zhang, G. S., El-Hosainy, H. M., Ismail, A. A., O'Shea, K. E., Falaras, P., Kontos, A. G. & Dionysiou, D. D. High performance sulfur, nitrogen and carbon doped mesoporous anatase–brookite TiO<sub>2</sub> photocatalyst for the removal of microcystin-LR under visible light irradiation. *J Hazard Mater.* **280**, 723-733 (2014).
- [14] Fotiou, T., Triantis, T. M., Kaloudis, T., Pastrana-Martinez, L. M., Likodimos, V., Falaras, P., Silva, A. M. T. & Hiskia, A. Photocatalytic degradation of microcystin-LR and off-odor compounds in water under UV-A and solar Light with a nanostructured photocatalyst based on reduced graphene oxide-TiO<sub>2</sub> composite. Identification of Intermediate Products. *Ind. Eng. Chem. Res.* **52**, 13991-14000 (2013).
- [15] Triantis, T. M., Fotiou, T., Kaloudis, T., Kontos, A. G., Falaras, P., Dionysiou, D. D., Pelaez, M. & Hiskia, A. Photocatalytic degradation and mineralization of microcystin-LR under UV-A, solar and visible light using nanostructured nitrogen doped TiO<sub>2</sub>. *J Hazard Mater.* **211**, 196-202 (2012).
